# Supplementary material for: Novel Liposomal Formulation with Azelaic Acid: Preparation, Characterization, and Evaluation of Biological Properties
Source: MDPI journal article supplement (doi:10.3390/app122413039), 2022-12-19

**Figure S1.** Particle size distribution diagram: a) blank liposomes; b) liposomes loaded with 15% AA; c) liposomes loaded with 20% AA; d) liposomes loaded with 25% AA.

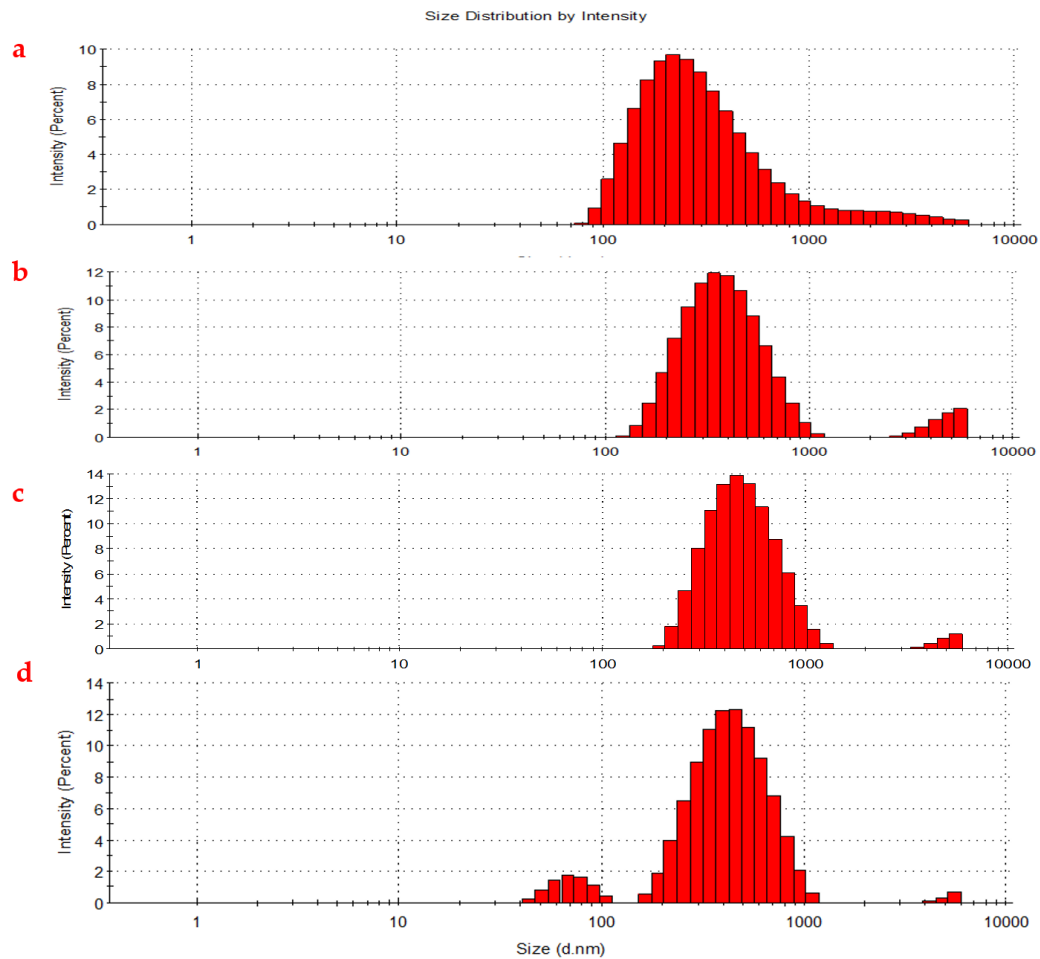

Supplement: s1 [file s1]
